# Supplementary material
Source: Springer Nature journal article supplement (https://www.springerprofessional.de/resource/supplementary/13638_2014_1022_MOESM3_ESM.pdf/11899068)

Costly Capacity Expansion  
Underutilized Assets  
Increased Unit Prices

Increased Congestions  
System Reliability Concerns

Transformer Failures  
Line Overloading  
Power Quality Deterioration

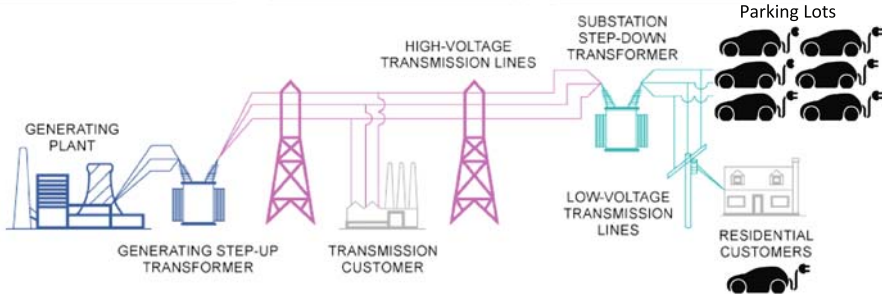

Supplement: MOESM3 [file 11899068]
